# Supplementary material for: Exploring Multi-level Determinants of Implementation of Nicotine Replacement Therapy Guidelines for Youth Vaping: A Mixed-Methods Case Study
Source: Research Square preprint supplement (doi:10.21203/rs.3.rs-8743595/v1), 2026-02-12
Supplement: Supplementary file 1 [file 946f2c07d794d90aec734fc0.docx]

| Reporting Item | Where in Manuscript |
| --- | --- |
| (1) Describe the justification for using a mixed methods approach to the research question | p. 5, lines 149-154:  Qualitative methods were used to provide a nuanced exploration of determinants of implementing NRT use per AAP guidelines in primary care that allowed for emergent findings. Quantitative methods provided a structured, quantifiable measurement and valence assessment (positive, neutral, or negative) using an existing survey instrument of providers’ perceptions of PRISM determinant constructs. |
| (2) Describe the design in terms of the purpose, priority and sequence of methods | p. 3, lines 107-110:  In collaboration between the program improvement team and an implementation research team, this study sought to explore multi-level determinants of implementing AAP guidelines to consider NRT for vaping and tobacco cessation for patients aged 12-17 years old in primary care settings using an implementation science framework-guided, mixed-methods design.  p. 5, lines 149-150:  We used a convergent, mixed methods design integrating rapid qualitative matrix analysis with quantitative descriptive analysis |
| (3) Describe each method in terms of sampling, data collection and analysis | p. 6, lines 162-170  We used purposive sampling to recruit primary care providers of various licensure (e.g. advanced practice provider vs medical doctorate) in the specialties of pediatrics and family medicine with a range of experience prescribing NRT for youth. Participants were eligible if they cared for youth aged 12-17 years old and were employed at the study site at the time of participation. We excluded individuals who were members of the program improvement team to avoid potential introduction of bias. Participants were recruited through having completed a prior survey administered by the PI team about youth vaping cessation and marking willingness to be contacted for interviews.  Full description of methods of data collection and analysis pp.6-7, lines 175-234 |
| (4) Describe where integration has occurred, how it has occurred and who has participated in it | pp. 7-8, lines 236-259  *Mixed-methods integration*  Following completion of qualitative and quantitative analysis, the PI and analyst linked themes/subthemes and constructs relating to PRISM-CSI survey items in a merging joint display.24 The authors ultimately chose to link themes/subthemes to individual PRISM-CSI items as opposed to subscales for two reasons. First, we felt that the level of detail in individual items allowed for a richer comparison with themes/subthemes that became diminished in use of mean subscale scores. Second, given the nature of modifications to the PRISM-CSI for use in this study, limited sample size, and degree of variable internal consistency across subscales in the validation of the original version of the scale,27 the authors found it challenging to make reliable or useful inferences at the level of the subscale.  After completing a merging display, the themes/subtheme content was then compared with the mean scores of individual items rated in pre-determined ranges as “Positive“ (**≥** 4.00), Moderately Positive” (3.50-3.99), “Neutral” (2.50-3.49), “Moderately Negative” (2.00-2.49), or “Negative” (< 2.00) to generate meta-inferences which were then entered into a *final joint display.* Themes/subthemes and mean item scores were assessed for convergence, divergence, or complementarity of findings. Convergence was considered if the directionality of item means matched conclusions from themes/subthemes. Divergence was considered if the directionality of item means did not appear to directly match conclusions from themes/subthemes. Complementarity was considered if either qualitative or quantitative strand provided additional insights not mostly captured by the other method strand. The PI and analyst conducted the initial merging process and meta-inference generation jointly until unanimous consensus was reached. Meta-inferences were then reviewed with all authors for clarity and accuracy. |
| (5) Describe any limitation of one method associated with the present of the other method | p. 19 lines 570-572:  Due to the use of the same participants for sequential interviews and surveys and an inability to fully anonymize survey responses, the potential for social desirability bias should also be noted. |
| (6) Describe any insights gained from mixing or integrating methods | Mixed methods findings on convergence, divergence, and complementarity found on pp. 14-16, lines 422-494 |
