# Supplementary material for: Exploring Multi-level Determinants of Implementation of Nicotine Replacement Therapy Guidelines for Youth Vaping: A Mixed-Methods Case Study
Source: Research Square preprint supplement (doi:10.21203/rs.3.rs-8743595/v1), 2026-02-12
Supplement: Supplementary file 2 [file a17e6b5665f2074b21d1be91.docx]

Rationale for choice of PRISM-CSI and modifications made: Though the original iteration of the PRISM-CSI was developed and validated in a different setting and population than this study’s, we chose to use the PRISM-CSI due to the breadth and specificity of contextual determinant constructs captured by its survey items and conceptual alignment with PRISM-guided qualitative methods. We likewise felt the detail of survey items would be more useful in informing targeted implementation strategies to be used in institutional program improvement efforts.

| **Original PRISM-CSI Items** | **PRISM-CSI Items in this Study** | **Rationale for Change** |
| --- | --- | --- |
| *My site is ready to support the implementation of [the intervention]* | ***My site is ready to support the implementation of prescription of nicotine replacement therapy for youth aged 12-17*** | N/A |
| *[The intervention] fits with the priorities at my site* | ***Prescription of nicotine replacement therapy for youth aged 12-17 fits with the priorities at my site*** | N/A |
| *There are no advantages to using prescription of [the intervention] compared to standard of care at my site. (reverse code)* | ***There are no advantages to using prescription of nicotine replacement therapy for youth aged 12-17 compared to standard of care at my site. (reverse code)*** | N/A |
| *[The intervention] is compatible with my workflow* | ***Prescription of nicotine replacement therapy for youth aged 12-17 is compatible with my workflow*** | N/A |
| *[The intervention] is user friendly* | *Omitted* | Omitted due to mismatch of intervention to description of “user friendly” in the validation manuscript of the PRISM-CSI |
| *The plan for [the intervention] implementation aligns with the needs and preferences of patients at my site* | ***The plan for prescription of nicotine replacement therapy for youth aged 12-17 implementation aligns with the needs and preferences of patients at my site*** | N/A |
| *[The intervention] will negatively impact care for patients at my site.* | ***Prescription of nicotine replacement therapy for youth aged 12-17 will negatively impact care for patients at my site. (reverse code)*** | N/A |
| *[The intervention] will equally benefit patients irrespective of factors related to disparities (e.g., comorbidities, race/ethnicity, social needs, literacy, transportation, or other challenges)* | ***Prescription of nicotine replacement therapy for youth aged 12-17 will equally benefit patients irrespective of factors related to disparities (e.g., comorbidities, race/ethnicity, social needs, literacy, transportation, or other challenges).*** | N/A |
| *It will be easy for patients to access [the intervention]* | ***It will be easy for patients to access prescription of nicotine replacement therapy for youth aged 12-17*** | N/A |
| *[The intervention] will be too difficult for patients.* | ***Prescription of nicotine replacement therapy for youth aged 12-17 will be too difficult for patients.*** | N/A |
| *There is organizational support for the implementation of [the intervention] at my site.* | ***There would be organizational support for the implementation of prescription of nicotine replacement therapy for youth aged 12-17 at my site.*** | Verb tense changed to reflect stage of pre-implementation |
| *My site lacks the resources needed for successful implementation.* | ***My site lacks the resources needed for successful implementation of prescription of nicotine replacement therapy of youth aged 12-17. (reverse code)*** | Intervention specifics added to provide clarification |
| *There is someone at my site whose specific job responsibility includes implementing, evaluating, and reporting on [the intervention].* | ***There is someone at my site who could help implement, evaluate, and report on prescription of nicotine replacement therapy for youth aged 12-17*** | Verb tense changed to reflect stage of pre-implementation |
| *The proposed plan for training and support for the implementation of [the intervention] is adequate.* | ***My site would require minimal training and support to begin prescription of nicotine replacement therapy of youth aged 12-17*** | No current plan had been in place to present to providers for training for support at the time of participation in the study. Given the construct was important to perceived implementation, the question was included and modified to reflect stage of pre-implementation. |
| *The proposed plan for ongoing monitoring of [the intervention] delivery and impact is appropriate.* | *Omitted* | Question not included due to no plan for monitoring in place to present to participants at time of participation in the study. |
| *Senior leadership at my site supports innovation.* | ***Senior leadership at my primary care clinic supports innovation*** | “Site” modified to “primary care clinic” to provide additional specification |
| *Staff members at my site are willing to cooperate to provide care to patients.* | ***Staff members at my primary care clinic are willing to cooperate to provide care to patients.*** | “Site” modified to “primary care clinic” to provide additional specification |
| *Staff members at my site are resistant to change in clinical processes.* | ***Staff members at my primary care clinic are resistant to change in clinical processes*** | “Site” modified to “primary care clinic” to provide additional specification |
| *Supervisors at my site provide effective management for continuous improvement of patient care.* | ***Supervisors at my primary care clinic provide effective management for continuous improvement of patient care.*** | “Site” modified to “primary care clinic” to provide additional specification |
| *I feel empowered to initiate improvements at my site.* | ***I feel empowered to initiate improvements at my primary care clinic.*** | “Site” modified to “primary care clinic” to provide additional specification |
| *Supervisors at my site are supportive of implementing new interventions to enhance care.* | ***Supervisors at my primary care clinic are supportive of implementing new interventions to enhance care.*** | “Site” modified to “primary care clinic” to provide additional specification |
| *Most patients at my site trust the clinicians and care they receive.* | ***Most patients aged 12-17 at my primary care clinic trust the clinicians and care they receive*** | “Site” modified to “primary care clinic” to provide additional specification and specification of age range of patients in question specified |
| *It is challenging to introduce new interventions to patients at my site* | ***It is challenging to introduce new interventions to patients aged 12-17 at my primary care clinic*** | “Site” modified to “primary care clinic” to provide additional specification and specification of age range of patients in question specified |
| *The complex health challenges of patients at my site make it difficult to implement innovations* | ***The complex health challenges of patients aged 12-17 at my primary care clinic make it difficult to implement innovations.*** | “Site” modified to “primary care clinic” to provide additional specification and specification of age range of patients in question specified |
| *The intervention] fits with current national priorities for [program].* | *Omitted* | Question omitted due to lack of clarity of what to include for “program” and did not appear to be applicable |
| *[The intervention] fits with priorities focused on technology modernization.* | *Omitted* | Question omitted due to the nature of the intervention under study that did not include technology |
| *Current events globally, nationally, or locally will negatively impact [the intervention] implementation at my site.* | ***Current events globally, nationally, or locally will negatively impact use of NRT for youth aged 12-17 at my primary care clinic*** | “Site” modified to “primary care clinic” to provide additional specification and specification of age range of patients in question specified |
| *[The intervention] will still be feasible when other new changes are implemented at my site.* | ***Use of NRT for youth aged 12-17 will still be feasible when other new changes are implemented at my primary care clinic*** | “Site” modified to “primary care clinic” to provide additional specification and specification of age range of patients in question specified |
| *There are likely to be regional or national mandates that will interfere with [the intervention] implementation at my site.* | ***There are likely to be regional or national mandates that will interfere with use of NRT for youth aged 12-17 at my primary care clinic*** | “Site” modified to “primary care clinic” to provide additional specification and specification of age range of patients in question specified |

Bold=Final survey items used for this study
