# Supplementary material for: Exploring Multi-level Determinants of Implementation of Nicotine Replacement Therapy Guidelines for Youth Vaping: A Mixed-Methods Case Study
Source: Research Square preprint supplement (doi:10.21203/rs.3.rs-8743595/v1), 2026-02-12
Supplement: Supplementary file 3 [file ffd69be387b20e26a762c4a1.docx]

| **Qualitative Findings (n=9)** | | |
| --- | --- | --- |
| **Theme** | **Subtheme** | **Additional Exemplar Quotes** |
| **1) Use of NRT per AAP guidelines as a reasonable option, given limited other options** | | *“I think [the AAP recommendation on NRT] sounds great…[when describing a typical visit now without using NRT as an option] we review whether there's any vaping use, and during the questionnaires, when they mark yes, it's really a challenge for me to say anything. I just say it's bad for you. I review the health complications; but whether changes occur [from that such as] stopping vaping? Not very often.” (P003)*  *“[I] was not familiar with the recommendations, although they certainly make sense…Not necessarily being proven, but why wouldn't they help?” (P006)*  *“I definitely think it’s reasonable and appropriate to encourage some type of NRT. Admittedly, again, I haven’t thought about using it for a 15-year-old, but it is helpful to have that support of the AAP saying we generally feel like this is safe and okay ’cause there is, I think, that piece versus an adult” (P009)* |
| **2) Provider-level challenges to adoption** | a) Potential time/work demands of NRT given limited time and other demands | *“[On discussions with patients interesting in quitting vaping] They usually will say something like, "I feel like I'm addicted. I'm having a hard time cutting back. I've tried to cut back, and I can't." Those are the kids that I'll bring up: These are the other things. These are all the things [like NRT] that can be helpful. I do that in general with teens as the menu option of: What do you wanna learn more about? Because again, in a 20 minute visit, I don't have time to do this whole spiel on it if they're really not interested.” (P001)*  *“[On times having had visits where NRT gets brought up] Honestly, most of the time this is coming with a handful of other things going on with the kid, and so it’s pretty rare that that’s the reason for the visit, and then we’re scheduling a dedicated follow-up for this.” (P004)*  *“[On barriers that make a given practice change effort unsuccessful] just a lack of time to the incremental addition of multiple tasks to visits” (P006)*  *“With our adolescent visits, we’re only given...[a] 20 minute block...They’re filling out their PHQ-4 and suicide tests and all the sexual health, and then the drugs, alcohol…I have X amount of time with this patient and if they vape and they have a high PHQ-4, probably I’m gonna focus more on the PHQ-4.’ That can make it hard.” (P008)* |
| b) Variable provider comfort levels in managing NRT | *“[On response to question about comfort not only prescribing but managing NRT] Yeah. I feel comfortable taking ownership.” (P004)*  *“[Describing a preference to refer to a vaping/tobacco cessation specialist versus managing on their own] I would probably [refer] with teens…and I would be very comfortable doing that. 'Cause I think what my only lack of comfort would be just like, ’Okay. One more thing that I need to learn or keep tabs on.’” (P006)*  *“Based on the [AAP guidance sheet], coming up with an initial dosage…I would feel comfortable with that. Ongoing management, tapering and all of that stuff—I would definitely need more CME before I could feel comfortable managing that.” (P007)* |
| **3) Systems- and clinic-level considerations to facilitate NRT use** | a) Confidentiality | *“The confidentiality issues and the coverage issues at our own institution, I think, would be really important to let providers know, ‘Hey, this is covered for teens. We can send it as a confidential prescription.’” (P001)*  *“[My] concern would be…whether patients will feel comfortable picking up the prescription and how will they do it in certain circumstances, when they don't want their parents to be aware that they are vaping” (P003)*  *“Another thing that I think is important in our population is confidentiality. Trying to figure out how to—if a patient really wants to stop vaping, but they don't want their family to know they're vaping…That's always something that comes up in pediatrics.” (P005)* |
| b) Insurance coverage/ affordability | *“Another thing that always comes up…especially our lower income families, is what will be covered by Medicaid…I may want somebody to be on a NRT and it's not covered so they're just not gonna do it” (P003)*  *“I think knowing, not that we probably could do a whole lot about who pays for what, but at least knowing the landscape of…which insurances are paying for this kind of [NRT] in that age group.” (P005)*  *“I mean I definitely think that just the social determinants or barrier of access to care, having health insurance or things to cost cover NRT” (P009)* |
| c) Managing NRT follow up | *“My concern is follow-up. I'm never sure if they actually got [the prescription]…I don't end up seeing them back because we often just see them for their physical…I would say of the kids I prescribed [NRT] to, I really don't know if they actually took it or not.” (P001)*  *“[It would be helpful if] there was a center with reasonable availability that the patients would then follow up with that would be willing to manage [NRT]” (P007)*  *“[Another barrier is] willingness to have any follow-up visits or check-in beyond their one—once a year, which often ends up being once every four years physical for teenagers” (P009)* |
| **4) Remaining patient and external barriers to uptake** | a) Patient perceptions of harms of vaping | *“I think when it was more of a short-term possibility of ending up in the hospital [due to lung injury], that maybe made [our patients] pay a little bit of attention. The long-term, ‘you could get cancer or stuff,’ they don't listen to that.” (P001)*  *“We definitely have parents who vape and I think that makes it harder to engage the family and the child in the concept that this is something that is not awesome and could benefit from this kind of treatment 'cause I just think it is the more members of the family are doing it, especially the people that they look up to that are supposed to be the role models and they're doing it, it makes it seem like much less of a problem.” (P005)*  *“The sad thing is, I’ve never had a teen ask me that, that I can think of in the last five years. I have not had a teen that has asked about resources to quit.” (P008)* |
| b) Potential patient preference for “non-medication” options | *“To be honest, most of them, if they even agree that they wanna cut down, most of 'em say, "Oh, I can do this on my own. I don't need medicine." I would say 90 percent of them.” (P001)*  *“[Recalling some patient quotes about NRT] ‘This is another thing that I have to do,’ or ‘I just don’t feel like taking medicine.’ ‘I don’t like taking medicine even if it’s a patch.’” (P004)* |
| c) Perceived inadequate public policy/health efforts to address youth vaping | *“Well, of course, there's been a lot of stuff in the news the last few years on products that are targeted specifically towards youth…I think that piece of it's important. The youth piece of flavored vapes and all that, I think, is a big issue. It's interesting to me that it's whether communities pass these bans or not” (P001)*  *“We could have stronger state-level policies around flavors” (P004)*  *“I think [vaping]'s been so normalized that people don't think it's a problem or that there could be dangers with it, so I think however that looks with public campaigns like they used to have these wonderful advertisements against big tobacco. I feel like I remember one where a bunch of people laid on the street and said these are all the people that died from tobacco or things like that that stick with me. I think public campaigns like that against tobacco specifically would be awesome. I think that would be part of that five-year looking back that would be helpful so that people want to engage in getting more healthy.” (P005)*  *“Maybe not very people have thought about [vaping cessation treatment] for teens, but I would think that people would kind of hear about it and go, "Oh. That's nice. That can work with teenagers, too?" (P006)*  *"I think we haven't done a great job with vaping. Sometimes, our approach to it seems like the…'Just Say No' campaign of the 1980s, like schools closing their bathrooms at lunch so kids can’t just go in there and vape.” (P007)* |
| **5) Culture and infrastructure for practice change that may help or hinder implementation** | a) Standardized communication channels | *“[On methods to disseminate information about practice change efforts] Yeah, I would think, I guess, emails. Maybe a presentation at a staff meeting. Those are typically the methods to get things out. Then maybe even posters in the room, because unfortunately patients are in those rooms sometimes longer than we want just waiting to see a provider. Many times, I have patients who say, "Hey, I just read on there that I should ask about the HPV vaccine. Should I get that?" (P002)*  *“I think the communication within the clinic, it's really clear…we also have staff meetings every month and that's when we review any changes… I think that really allows so everybody’s on…the same step, on the clinic changes.” (P003)*  *“[On a prior practice change project] They started with provider meetings. They'd say, "Hey, we know this thing is kind of a problem for us and our families and we want to do something about it, and this is what we propose." And then get questions from other providers about what difficulties they might see with that such as for instance that one was like, "Well, it's not in Spanish." It is now, but it wasn't and then also once all the providers agreed, okay, this sounds like a reasonable pilot, then we have the larger staff meeting and then that's when we tell the staff that that's what we are planning to do” (P005)* |
| b) Infrastructure for evaluation and monitoring | *“If you're not monitoring stuff…attrition is probably the most common thing, is people stop thinking about it, and then they don't do it. Sometimes there's really specific things that might be happening that you might have to dig into.” (P001)*  *“[On a prior effort to improve antimicrobial stewardship] Yeah, they even gave us a percentage of…there was a 10 percent improvement in watchful waiting…I would even get emails. This is how much you're prescribing antibiotics for otitis media…so it will give me awareness. It was like, "Oh, maybe I'm doing it too much."” (P003)* |
| c) Multi-level engagement and support for practice change | *“I feel like our clinic overall has a really good team mentality and people would overall be interested in supporting a practice change…then, yeah, I guess just leadership—more of the logistical changes that would need to be supported by leadership” (P002)*  *“[When discussing example clinic practice change of SWYC questionnaire implementation] From the moment [patients] check in, the front desk, they already give the patients the correct questionnaires that's under age; and by the time they come to me, they already filled it out. I'm able to screen that. I think that's been going really smooth, the process for that…I think that's the main thing, that the whole team is involved, not just providers or MAs, or front desk. It's the whole team is accountable for this change...let's say that it's been missed by both the front desk and the MAs. Me as a provider, I'm aware like, ‘Oh, we need to do this for part of the screening, so let's go ahead and do it while we do the visit.’ I think just having the whole team involved has really been helpful on taking accountability of implementing this change." (P003)* |
| d) Clinical champion culture | *“At all of our family practice clinics, we have different champions” (P002)*  *“We do have champions in our clinics so I could be the champion in my clinic to say, "Okay, I'm the one who knows how to do this at our clinic," so [the patient] may see somebody besides their PCP but still [be in] their medical home.” (P005)*  *“On our clinic level, not infrequently, we have a whole bunch of people, a whole bunch of providers, who are champions of this or that or the other thing like…tobacco cessation and Reach Out & Read.” (P006)* |
| e) “Information overload” | *“I think it's mass-information overload for one thing. Just a constant stream of information, data changing the surveys...Just like, ‘Don't give me one more thing to do, 'cause I'm already maxed out juggling a million balls.’” (P006)*  *“I think too sometimes there’s so much change and so much we’re constantly being asked to update or adjust that it becomes overwhelming. You’re like oh, what was that new email from two weeks ago, ’cause I can't keep it straight.” (P009)* |
